# Supplementary material for: Anopheline salivary protein genes and gene families: an evolutionary overview after the whole genome sequence of sixteen Anopheles species
Source: PubMed Central journal article supplement (PMC5307786; doi:10.1186/s12864-017-3579-8), 2017-02-13
Supplement: 12864_2017_3579_MOESM1_ESM.pdf [file 12864_2017_3579_MOESM1_ESM.pdf]

| Protein                       | Accession  | Length (aa) | MW (kDa) | Chromosome | For or Rev |
|-------------------------------|------------|-------------|----------|------------|------------|
| <b>Ag5 family</b>             |            |             |          |            |            |
| gVAG                          | AGAP006421 | 260         | 29.01    | 2L-24D     | F          |
| Ag5r2                         | AGAP006419 | 257         | 28.13    | 2L-24D     | F          |
| Ag5r3                         | AGAP003354 | 260         | 28.69    | 2R-15A     | F          |
| Ag5r4                         | AGAP006420 | 267         | 29.94    | 2L-24D     | F          |
| Ag5r5                         | AGAP006418 | 266         | 29.31    | 2L-24D     | F          |
| Ag5r6                         | AGAP013192 | 260         | 28.68    | 2R-15A     | F          |
| <b>Apy/5'nuc family</b>       |            |             |          |            |            |
| Apyrase                       | AGAP011971 | 558         | 61.82    | 3L-45A     | F          |
| 5'nucleotidase                | AGAP011026 | 570         | 63.54    | 3L-41A     | R          |
| <b>cE5/anophelin</b>          | AGAP008004 | 103         | 9.86     | 3R-29C     | R          |
| <b>D7 family</b>              |            |             |          |            |            |
| D7r1                          | AGAP008284 | 165         | 18.74    | 3R-30B     | R          |
| D7r2                          | AGAP008282 | 168         | 18.48    | 3R-30B     | R          |
| D7r3                          | AGAP008283 | 169         | 18.65    | 3R-30B     | R          |
| D7r4                          | AGAP008281 | 165         | 19.31    | 3R-30B     | R          |
| D7r5                          | AGAP008280 | 166         | 18.81    | 3R-30B     | R          |
| D7L1                          | AGAP008278 | 311         | 35.59    | 3R-30B     | F          |
| D7L2                          | AGAP008279 | 315         | 36.14    | 3R-30B     | F          |
| D7L3                          | AGAP028120 | 291         | 33.68    | 3R-30B     | F          |
| <b>epoxy_hydrolase</b>        | AGAP011970 | 397         | 45.27    | 3L-45A     | R          |
| <b>hyp4.2-hyp13</b>           |            |             |          |            |            |
| hyp4.2                        | AGAP003473 | 62          | 6.77     | 2R-15C     | F          |
| hyp13                         | AGAP003474 | 56          | 6.19     | 2R-15C     | F          |
| <b>hyp6.2-hyp8.2</b>          |            |             |          |            |            |
| hyp6.2                        | AGAP006495 | 85          | 9.29     | 2L-25A     | R          |
| hyp8.2                        | AGAP006494 | 91          | 9.86     | 2L-25A     | R          |
| <b>hyp10/hyp12 family</b>     |            |             |          |            |            |
| hyp10                         | AGAP008307 | 90          | 10.02    | 3R-30B     | F          |
| hyp12                         | AGAP008306 | 92          | 10.14    | 3R-30B     | F          |
| <b>hyp15/hyp17 family</b>     |            |             |          |            |            |
| hyp15                         | AGAP000152 | 78          | 8.02     | X-4A       | R          |
| hyp17                         | AGAP000151 | 77          | 8.10     | X-4A       | R          |
| <b>hyp37.7 family</b>         |            |             |          |            |            |
| hyp37.7                       | AGAP001988 | 267         | 29.34    | 2R-10A     | F          |
| hyp37.7-2                     | AGAP001989 | 257         | 28.71    | 2R-10A     | F          |
| <b>Salivary amylase</b>       | AGAP006371 | 876         | 94.18    | 2L-24C     | R          |
| <b>Salivary maltase</b>       | AGAP002102 | 593         | 67.30    | 2R-10C     | F          |
| <b>Salivary Peroxydase</b>    | AGAP010735 | 590         | 66.55    | 3L-39C     | R          |
| <b>Salivary SerPro family</b> |            |             |          |            |            |
| SerPro1                       | AGAP011912 | 395         | 42.11    | 3L-44C     | R          |
| SerPro2                       | AGAP011914 | 398         | 43.36    | 3L-44C     | F          |
| SerPro3                       | AGAP011913 | 399         | 43.16    | 3L-44C     | F          |
| <b>Salivary trypXII</b>       |            | 270         | 28.67    | 2R-14E     |            |
| <b>SG1 family</b>             |            |             |          |            |            |
| SG1                           | AGAP000612 | 401         | 46.14    | X-1D       | F          |
| SG1a                          | AGAP000611 | 415         | 48.34    | X-1D       | F          |
| Saglin                        | AGAP000610 | 431         | 49.30    | X-1D       | F          |
| SG1-like2                     | AGAP000609 | 401         | 46.56    | X-1D       | F          |
| SG1-like3                     | AGAP000607 | 392         | 44.59    | X-1D       | R          |
| SG1b                          | AGAP000548 | 385         | 43.64    | X-1D       | F          |
| TRIO                          | AGAP001374 | 391         | 43.82    | 2R-8A      | F          |
| <b>SG2 family</b>             |            |             |          |            |            |
| SG2                           | AGAP006506 | 114         | 11.85    | 2L-25A     | R          |
| SG2b                          | AGAP006504 | 173         | 17.67    | 2L-25A     | R          |
| <b>SG5</b>                    | AGAP004334 | 332         | 38.21    | 2R-19A     | F          |
| <b>SG6</b>                    | AGAP000150 | 115         | 13.09    | X-4A       | R          |
| <b>SG7 family</b>             |            |             |          |            |            |
| SG7                           | AGAP008216 | 145         | 16.30    | 3R-30A     | R          |
| SG7-2                         | AGAP008215 | 141         | 16.39    | 3R-30A     | R          |
| SG7-3                         | AGAP013724 | 144         | 16.74    | 3R-30A     | R          |
| <b>SG8</b>                    | AGAP010647 | 224         | 25.43    | 3L-39C     | R          |
| <b>SG9</b>                    | AGAP013423 | 393         | 42.79    | 2R-17B     | F          |
| <b>30 kDa</b>                 | AGAP009974 | 252         | 26.90    | 3R-36B     | R          |
| <b>55.3 kDa</b>               | AGAP005822 | 513         | 55.25    | 2L-23A     | F          |
