# Supplementary material for: Anopheline salivary protein genes and gene families: an evolutionary overview after the whole genome sequence of sixteen Anopheles species
Source: PubMed Central journal article supplement (PMC5307786; doi:10.1186/s12864-017-3579-8), 2017-02-13
Supplement: 12864_2017_3579_MOESM4_ESM.pdf [file 12864_2017_3579_MOESM4_ESM.pdf]

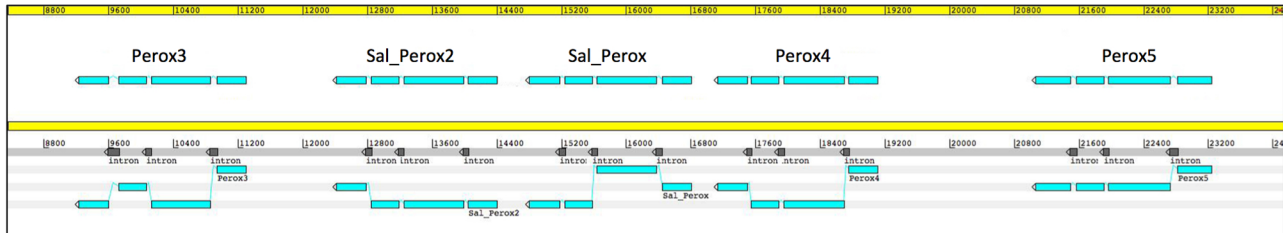

|                          | <b>AGAP010735</b> | <b>Sal_Perox</b> | <b>Sal_Perox2</b> | <b>Perox3</b> | <b>Perox4</b> | <b>Perox5</b> |
|--------------------------|-------------------|------------------|-------------------|---------------|---------------|---------------|
| <b>AGAP010735</b>        | 100               | 54.44            | 75.55             | 54.03         | 53.74         | 49.15         |
| <b>anoalb_Sal_Perox</b>  | 54.44             | 100              | 53.68             | 50.6          | 72.33         | 47.46         |
| <b>anoalb_Sal_Perox2</b> | 75.55             | 53.68            | 100               | 52.92         | 52.81         | 51.61         |
| <b>anoalb_Perox3</b>     | 54.03             | 50.6             | 52.92             | 100           | 48.89         | 45.72         |
| <b>anoalb_Perox4</b>     | 53.74             | 72.33            | 52.81             | 48.89         | 100           | 47.8          |
| <b>anoalb_Perox5</b>     | 49.15             | 47.46            | 51.61             | 45.72         | 47.8          | 100           |
