# Supplementary material for: Anopheline salivary protein genes and gene families: an evolutionary overview after the whole genome sequence of sixteen Anopheles species
Source: PubMed Central journal article supplement (PMC5307786; doi:10.1186/s12864-017-3579-8), 2017-02-13
Supplement: 12864_2017_3579_MOESM5_ESM.pdf [file 12864_2017_3579_MOESM5_ESM.pdf]

Genomic coordinates and amino acid sequences for various proteins across multiple samples. The table is organized into columns representing different samples and rows representing different protein segments. Each cell contains a three-letter amino acid code. Red highlighting is used to indicate specific amino acid changes or conserved regions across the different samples.

Second section of genomic coordinates and amino acid sequences, similar in format to the first section. This section continues the comparison of amino acid sequences across the same set of samples, with red highlighting indicating specific differences or conserved motifs.

Third section of genomic coordinates and amino acid sequences. This section shows further alignments and comparisons of protein sequences, maintaining the red-highlighted patterns to track specific amino acid positions across the various samples.

Fourth and final section of genomic coordinates and amino acid sequences. This section concludes the alignment of protein sequences, with red highlighting used to emphasize key amino acid residues and their conservation or divergence across the different experimental conditions or samples.

(A)

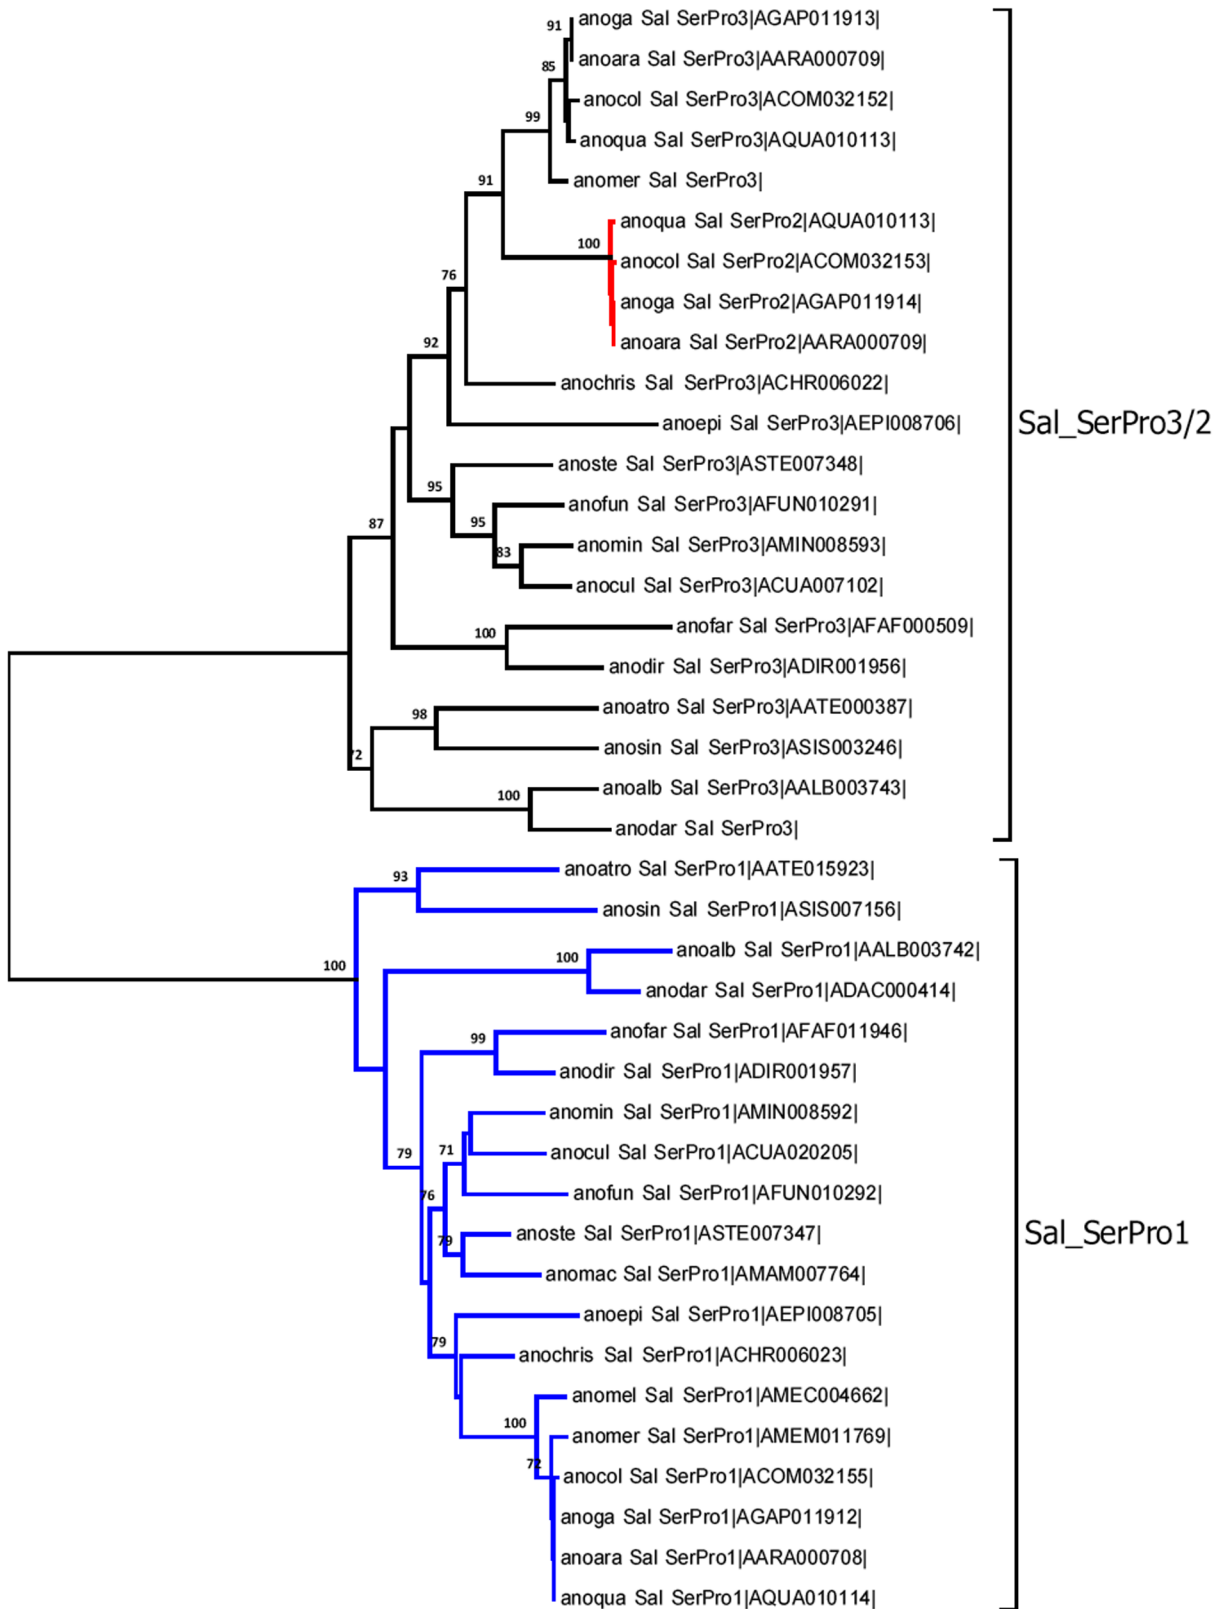

0.05

(B)
