# Supplementary material for: Anopheline salivary protein genes and gene families: an evolutionary overview after the whole genome sequence of sixteen Anopheles species
Source: PubMed Central journal article supplement (PMC5307786; doi:10.1186/s12864-017-3579-8), 2017-02-13
Supplement: 12864_2017_3579_MOESM7_ESM.pdf [file 12864_2017_3579_MOESM7_ESM.pdf]

anoga gVAGIAGAP006421 ... -- -- -- GGGY ... SS S D ... PR R G G P H V G G N P P P S S S G G G P T ... Q Q G K K Q A R K K V L L T P A L Q A Y I M D E H N L N R S N I A L G G G R I R P Y P S A V K M P T L T W D P E L A S L A D A N A R S S C C C N Y G H D R R A T T K K F P Y A G O N I A I T Q F F G Y ...
