# Supplementary material for: Anopheline salivary protein genes and gene families: an evolutionary overview after the whole genome sequence of sixteen Anopheles species
Source: PubMed Central journal article supplement (PMC5307786; doi:10.1186/s12864-017-3579-8), 2017-02-13
Supplement: 12864_2017_3579_MOESM11_ESM.pdf [file 12864_2017_3579_MOESM11_ESM.pdf]

anoga 55.3kDa|AGAP005822| -- L P D F A V P A R M T G V A S G S L D - S S G N V Q N T A R V L L H L D Q F O S I T E S L Y G L O T P T L Y R L A T G L R V V L D S L V E S G S P I F Q G L S N A A R L S T G  
anora 55.3kDa|AAR007686| -- L P D F A V P A R M T G V A S G S L D - S S G N V Q N T A R V L L H L D Q F O S I T E S L Y G L O T P T L Y R L A T G L R V V L D S L V E S G S P I F Q G L S N A A R L S T G  
anoqua 55.3kDa|AQUA011055| -- L P D F A V P A R M T G V A S G S L D - S S G N V Q N T A R V L L H L D Q F O S I T E S L Y G L O T P T L Y R L A T G L R V V L D S L V E S G S P I F Q G L S N A A R L S T G  
anome 55.3kDa|AMEM018002| S L P D F A V P A R M T G V A S G S L D - S S G N V Q N T A R V L L H L D R F O S I T E S L Y G L O T P T L Y R L A T G L R V V L D S L V E S G S P I F Q G L S N A A R L S T G  
anome 55.3kDa|AMEM005302| -- L P D F A V P A R M T G V A S G S L D - S A G N V Q N T A R V L L H L D Q F O S I T E S L Y G L O T P T L Y R L A T G L R V V L D S L V E S G S P I F Q G L S N A A R L S T G  
anochis 55.3kDa|ACHR005317| S P D F A V P A R M T G V A S G S L D - S S G N V Q N T A R V L L H L D Q F O S I T E S L Y G L O T P T L Y R L A T G L R V V L D S L V E S G S P I F Q G L S N A A R L S T G  
anoepl 55.3kDa|AEPI006718| S P D F A V P A R M T G V A S G S L D - S S G N V Q N T A R V L L H L D Q F O S I T E S L Y G L O T P T L Y R L A T G L R V V L D S L V E S G S P I F Q G L S N A A R L S T G  
anofun 55.3kDa|AFUN000965| S K P D F A V P A R M T G V A S G S L D - S T G N V Q N T A R V L L H L D Q F O S I T E T L Y R L O T P D L Y Q L A T S F R V L D S L V E S G S P I F Q A L S N A A R L S S G  
anomin 55.3kDa|AMINO11164| S R P D F A V P A R M T G V A S G S L D - S T G N V Q N T A R V L L H L D Q F O S I T E T L Y R L O T P D L Y Q L A T S F R V L D S L V E S G S P I F Q A L S N A A R L S S G  
anocul 55.3kDa|ACUA027649| S P R P D F A V P A R M T G V A S G S L D - S T G N V Q N T A R V L L H L D Q F O S I T E T L Y R L O T P D L Y Q L A T S F R V L D S L V E S G S P I F Q A L S N A A R L S S G  
anoste 55.3kDa|ASTE007423| N W P D F A V P A R M T G V G S G S L D - S T G N V Q N T A R V L L H L D Q F O S I T E T L Y G L O T P E L Y R L A T G F R V L D S L V E S G S P I F Q G L S N A A R L S S G  
anoste 55.3kDa|ADIR007794| S P S P D F A V P A R M T G V A S G S L D - P G S G N V Q N T A R V L L A V Q F O S I T E S L Y G L O T P T L Y R L A T G F R V V M D S L V E S G S P I F Q A L S N A A R L S S G  
anoste 55.3kDa|ATE019916| S P S P D F A V P A R M T G V A S G S L D - S T G N V Q N T A R V L L H L D Q F O S I T E T L Y R L O T P E L Y R L A T G F R V V M D S L V E S G S P I F Q A L S N A A R L S S G  
anosin 55.3kDa|ASIS012753| S K P D F A V P A R M T G V A S G S L D - S T G N V Q N T A R V L L H L D Q F O S I T E T L Y R L O T P E L Y R L A T G F R V V M D S L V E S G S P I F Q G L S N A A R L S S G  
anoalb 55.3kDa|AALB005741| -- I P D F A V P A R L T G V G S G N L D - R T G N V Q N A N R V L A V L E Q F O S I T E W L Y L O T P D L Y H L A A R F R T V M D S L V E S G S P I F Q G L S N A A R L S S G  
anodar 55.3kDa| -- S P D F A V P A R M T G V G S G N L D - R T G N V Q N A N R V L A V L E Q F O S I T E W L Y L O T P D L Y R L A T R F R T V M D S L V E T G S P I F Q G L S N A A R L S S G  
cxpl 56.5kDa|CPJU02089| -- D L T V P A T I A G S T G S S G - T N G N I V A N D R I L G L N Q F H T I V E N L Y L E L P E S N A S E N F R V M D S L V E S G S P I F Q G L S N V A K I S S G  
aeag 56.5kDa|AAEL009081| E K P L D V P V T I T G V S T G S L D - T N G N I V A N D R I L A T L N Q F O S I T E W L Y F I K S P E Y A E A A D N F R Y M D S L V E A G S P I F Q G L S N V A K I S S G  
aealb 56.5kDa|AALF019776| D P R P D L A V P T I P G V S G S L D - T N G N I V A N D R I L A T L N Q F O S I T E W L Y Y I K T P E Y A E V A D N F R Y M D S L V E A G S P I F Q G L A N V A K I S S G

anoga 55.3kDa|AGAP005822| N I T T V F D G I R R S I N G T I A L H E L H Q S A L N G T V L L L G T G G V H N I S T V L H Q L V R N V A N L T G A L D E I E P A I V A I Q E Q E L S - - - - - R P T Q A O V  
anora 55.3kDa|AAR007686| N I T T V F D G I R R S I N G T I A L H E L H Q S A L N G T V L L L G T G G V H N I S T V L H Q L V R N V A N L T G A L D E I E P A I V A I Q E Q E L S - - - - - R P T Q A O V  
anoqua 55.3kDa|AQUA011055| N I T T V F D G I R R S I N G T I A L H E L H Q S A L N G T V L L L G T G G V H N I S T V L H Q L V R N V A N L T G A L D E I E P A I V A I Q E Q E L S - - - - - R P T Q A O V  
anome 55.3kDa|AMEM018002| N I T T V F D G I R R S I N G T I A L H E L H Q S A L N G T V L L L G T G G V H N V S T V L H Q L V R N V A N L T G A L D E I E P A I V A I Q E Q E L S - - - - - R P T Q A O V  
anome 55.3kDa|AMEM005302| N I T T V F D G I R R S I N G T I A L H E L H Q S A L N G T V L L L G T G G V H N V S T V L H Q L V R N V A N L T G A L D E I E P A I V A I Q E Q E L S - - - - - R P T Q A O V  
anochis 55.3kDa|ACHR005317| N I T T V F D G I R R S I N A T I A L N E L H Q S A I N G T V L L L G T A S V Q N I S T V L D Q L V R N V A N L T G A L D E I E P A I V E I Q R E V S - - - - - R P T Q A O V  
anoepl 55.3kDa|AEPI006718| N I T T V F D G I R R S I N A T I A L N E L H Q S A I N G T V L L L G T A G V Q N I S F V L D Q L V R N V A N L T G A L D E I E P A I V E I Q O D - V G S - - - - - R P S Q A O V  
anofun 55.3kDa|AFUN000965| N I T T V F D G I R R S I N A T I A L N E L H Q S A I N G T V L L L G T A G V Q N I S F V L D Q L V R N V A N L T G A L D E I E P T L V E I Q - - - - - Q L S - - - - - R P S Q A O V  
anomin 55.3kDa|AMINO11164| N I T T V F D G I R R S I N A T I A L N E L H Q S A I N G T V L L L G T A G V Q N I S T V L D Q L V R N V A N L T G A L D E I E P T L V E I Q - - - - - Q L Y - - - - - R P S Q S L V  
anocul 55.3kDa|ACUA027649| N I T T V F D G I R R S I N A T I A L N E L H Q S V I N G T G L L L G S A G V R N I S T V L D Q L V R N V A N L S T T L D E I E P T L V E L Q - - - - - Q L S - - - - - R P S Q S V L  
anoste 55.3kDa|ASTE007423| N I T T V F D G I R R S I N A T I A L N E L H Q A A I N G T S L L L G T A G V Q N I S T V L D Q L V R N V A N L S V T L D E I E P A L V E I Q - - - - - Q L V - - - - - R P S Q A L V  
anoste 55.3kDa|ADIR007794| N I T A V D G R I R T I N A T I A L N E L H Q A A I N G T Q L F L G G V G V N I S T V L D Q L V R N V A N L T G A L D E I E P A I V I Q R E V S - - - - - R L P - - - - - R P T Q O V  
anoste 55.3kDa|ATE019916| N I S T A F I Q R S I N A T I N D O H Q A S L N G T Q L F L G G V G V N I S T V L D Q L V R N V A N L T G A L D E I E P A I V I Q R E V S - - - - - R L P - - - - - R P T Q A O V  
anosin 55.3kDa|ASIS012753| N I T A I F G I Q R S I N A T I N D O H Q A S L N G T Q L F L G G V G V N I S T V L D Q L V R N V A N L T G A L D E I E P A I V I Q R - - - - - R L P - - - - - R P T Q A O V  
anoalb 55.3kDa|AALB005741| N I T S L F A G I Q R S I D V T A L N N H Q L T I N E T R P F L G E A G V R N I S T V L D L L V R N V R N L S T V L D E I E P A L A D L Q R L L A G A A S P A S A A L V  
anodar 55.3kDa| -- N I T A L V A G I Q R S V N V T A L N N H Q L T I N E T R P F L G E T G V H N I S T V L D L L V R N V R N L S T V L D D I E P A I A D L Q R L L H Q A A S P - - - - - G A T A L A  
cxpl 56.5kDa|CPJU02089| D P E K A F N V V R A N K T A V D L N E D H I V L V N T R L V L G D N T T N H F M D V L L N L T I L S N V S L I L D N I Q R A A V E I Q - - - - - S L S - - - - - K K S P A A V  
aeag 56.5kDa|AAEL009081| D V G R A F K G T R D D I S Y A V D L H E E H I S L V D A S R G I L G N A T T A D Y F E G L G K L V G L N M N I T E L L N N I Q S A V V I Q I - - - - - Q V N - - - - - P R T Q A A V  
aealb 56.5kDa|AALF019776| N I E R A F N G I R S D I V T I D L H E E H M S L V A S R G I L G N A T T A D Y F E G L G K L F E L N M N I T S L N I Q S A V V I Q I - - - - - Q L N - - - - - P R T Q A A V

anoga 55.3kDa|AGAP005822| D G R Y P R A A I R R L N G I L L D Y V N I G Q A T V P Q I N A V V N R I R M M D G F I G R L A A V T D G L W S D L N R T L A A V N G - S V Y A G V Q Q R L H T T A I R I R N S F N  
anora 55.3kDa|AAR007686| D G R Y P R A A I R R L N G I L L D Y V N I G Q A T V P Q I N A V V N R I R M M D G F I G R L A A V T D G L W S D L N R T L A A V N G - S V Y A G V Q Q R L H T T A I R I R N S F N  
anoqua 55.3kDa|AQUA011055| D G R Y P R A A I R R L N G I L L D Y V N I G Q A T V P Q I N A V V N R I R M M D G F I G R L A A V T D G L W S D L N R T L A A V N G - S V Y A G V Q Q R L H T T A I R I R N S F N  
anome 55.3kDa|AMEM018002| D G R Y P R A A I R R L N G I L L D Y V N I G Q A T V P Q I N A V V N R I R M M D G F I G R L A A V T D G L W S D L N R T L A A V N G - S V Y A G V Q Q R L H T T A I R I R N S F N  
anome 55.3kDa|AMEM005302| D G R Y P R A A I R R L N G I L L D Y V N I G Q A T V P Q I N A V V N R I R M M D G F I G R L A A V T D G L W S D L N R T L A A V N G - S V Y A G V Q Q R L H T T A I R I R N S F N  
anochis 55.3kDa|ACHR005317| N A R Y P R S A I R R L N G I L L D Y V N I G Q T T V P Q I N A V V N R I R M M D G F I G R L E S V T D G L Q N D L N R T L A A V N G - S V Y T V Q Q R L O T T I R T I R N N F N  
anoepl 55.3kDa|AEPI006718| D A R Y P R S A I R R L N G I L L D Y V N I G Q A T V P Q I N A V V N R I R M M D G F I G R L V S V R D Y L D L N R T L A A V N G - S V Y A G V Q Q R L H A T I R T V G N L F N  
anofun 55.3kDa|AFUN000965| D S L Y P R N G I R K L N A I L L D Y V N I G R T T V P Q I N A V V N R I R M M D G F I G R A L T S V T S G L R N Y L N S S L I A V N G - S V Q S V Q Q R L O T A I R T I R T F N F N  
anomin 55.3kDa|AMINO11164| D S R Y P R N G I R K L N A I L L D Y V N I G Q S T V P Q I N A V V N R I R M M D G F I A R L A S V T S G L R N Y L N S S L I A V N G - S V Y S G V Q Q R L O T A I R T I R T F N F N  
anocul 55.3kDa|ACUA027649| D S Q Y P R N G I R K L N A I L L D Y V N I G Q S T V P Q I N A V V N R I R M M D G F I A R L A S V T S G L R N Y L N S S L I A V N G - S V Y S G V Q Q R L O T S I R T I R T F N F N  
anoste 55.3kDa|ASTE007423| D S R Y P R D I R K L N A I L L D Y V N I G R S T V P Q I N A V V N R I R M M D G F I T L A S V T G L R S Y L N S T L A T V N G - T Y I N G Q Q R L O N A L R T I R T F N F N  
anoste 55.3kDa|ADIR007794| D S M Y P K D A V R R L N A I L L D Y V N I G A S T V P Q I N A V V N R I R L M D G F I G R L T A V A G A O R T A L N S T T A A V N A - S V Q S V Q L R L Q N T L R A M R T F N F N  
anoste 55.3kDa|ATE019916| D S M Y P K D A V R R L N A I L L D Y V N I G V T S T V P Q I N A V V N R I R L V D S F I A R L S S V A T Q O O S N L N S M R A V N G - S V Y T G V Q Q R L L Q N A V R A I R T S F S  
anosin 55.3kDa|ASIS012753| D S M Y P K D A V R R L N A I L L D Y V N I G V T A T V P Q I N A V V N R I R L V D S F I A R L S S V A T Q O O S N L N S I R A V N G - T A Y N G V Q Q R L L Q S A V R A V R I S F S  
anoalb 55.3kDa|AALB005741| E R L Y P R A A V R Q L N A I L L D Y V N I G V A T V P Q I N A V V N R I R L M D G F I G R L D S V A T T Q O O S N L A S L A T V N G - T L R N Y Q Q R L R A A V R G L A P A F N  
anodar 55.3kDa| -- D R L Y P R A A V R K L N D I L L D Y V N I G V A T V P Q I N A V V N R I R L M D G F I G R L D S V A T T Q O O S N L A S L A S V N G - T L R N Y V E G R L R A A V R G L A P A F N  
cxpl 56.5kDa|CPJU02089| N A L L P N S D K A L A V R Q Y I Q I D S A P E I R S V Y R I O T V D N K S R S I S V S F E Y Q R S L N T Y I N R T S A P Y L Q S N I N T L V N G L A N L R K O L V  
aeag 56.5kDa|AAEL009081| N A L L P N S D K A L A V R Q Y I Q I D S A P E I R S V Y R I O T V D N K S R S I S V S F E Y Q R S L N T Y I N R T S A P Y L Q S N I N T L V N G L A N L R K O L V  
aealb 56.5kDa|AALF019776| N A L L P N S D K A L A V R Q Y I Q I D S A P E I R S V Y R I O T V D N K S R S I S V S F E Y Q R S L N T Y I N R T S A P Y L Q S N I N T L V N G L A N L R K O L V

anoga 55.3kDa|AGAP005822| A T - - - V L G T A R K L L F F L D D L E E L Q L V A R N A S A L L V K R L T N V T G A L D G L V N R T E V R - - - L E G Y E S E L V N R T I A A V T D L A W R L A L S V T S S  
anora 55.3kDa|AAR007686| A T - - - V L G S A R K L L F F L D D L E E M Q L V A R N A S A L L A K R L T N V T G A L D E L V N R T E V R - - - L E G F E S E L V N R T I A A V T D L A W R L A L S V T S S  
anoqua 55.3kDa|AQUA011055| A T - - - V L G T A R K L L F F L D D L E E M Q L V A R N A S A L L V K R L A N V T G A L D G L V N R T E V R - - - L E G Y E S E L V N R T I A A V T D L A W R L A L S V T S S  
anome 55.3kDa|AMEM018002| A T - - - V L G T A R K L L F F L D D L E E M Q L V A R N A S A L L V K R L A N V T G A L D G L V N R T E V R - - - L E G Y E S E L V N R T I A A V T D L A W R L A L S V T S S  
anome 55.3kDa|AMEM005302| A T - - - V L G T A R K L L F F L D D L E E M Q L V A R N A S A L L V K R L T N V T G A L D G L V N R T E V R - - - L E G Y E S E L V N R T I A A V T D L A W R L A L S V T S S  
anochis 55.3kDa|ACHR005317| A S - - - V L G T A R K L L F F L D D L E T I R L V A L N A S G O L G E R L N V T Q Q L D E L V N R T E V R - - - M A G D E S E L V M N R T V A A V T D L W R L A L S V T S S  
anoepl 55.3kDa|AEPI006718| A S - - - V L G T M R K L L F F L D D V E E I R L E A R N A S A L S Q R L T N V T Q Q L D E L V N R T E V R - - - M D G Y E T E L V M N R T I A A V T D L W R L A L S V T S S  
anofun 55.3kDa|AFUN000965| T G - - - V T A T R K L K L F F L D D L T V R M E A Q N A S G L V K R L N S V T Q S L D E L V N R T E V R - - - M E G E T E W Y M N R T I A A V T D L A W R L A L S V T S S  
anomin 55.3kDa|AMINO11164| A T - - - V T A T R K L K L F F L D D L T V R M E A Q N A S G L V K R L N S V T Q S L D E L V N R T E V R - - - M A S G R M E L S Y I M N R T I A A V T G L A W R L A L S V T S S  
anocul 55.3kDa|ACUA027649| A S - - - V T A T R K L K L F F L D D L T V R M E A Q N A S G L V Q R T N V T Q S L D E L V N R T E V R - - - M E G R E S E W Y M N R T I A A V T G L A W R L A L S V T S S  
anoste 55.3kDa|ASTE007423| G T - - - V T S T T R K L L F F L D D L E S V Q L A A R N A S G L V K R L N S V T Q S L D E V A N N T V V - - - M E G H E T E W M N R T I A I V T E L A W R M A L S V T S S  
anoste 55.3kDa|ADIR007794| G T - - - V L V T R K L K L F F L D D V T A I R Q V A R N A S A L L T E R L T N V T Q S L D V N T R T V R - - - V D G R A S E W Y M N R T N G V M L A W R T A L S V T S G  
anoste 55.3kDa|ATE019916| G S - - - M A T A S R K L R P P V D E V A I L R Q V A Q N S T G L D G R Q S N V T Q T L D V L T D R V Q V R - - - L A E R M A R G V L N R T V A A V T L N A W R F A L S V T S S  
anosin 55.3kDa|ASIS012753| D A - - - M S V A S R K L R P P V D E V D I L R Q V A Q N S T G L L E E R L S N V T Q T L D V V G G R I V L V - - - V A E R S A E G V L N R T I A A V N D L A W R L T L S V T S D  
anoalb 55.3kDa|AALB005741| R S - - - I T E A T R K L R P L M A D Q - - - V L Q E V A R N A T D R L T R L A N T E T L B T L - A D R I V V Q E Q A D R T R L I M N L V A A I G E L A W N T L A V T S A  
anodar 55.3kDa| -- R S - - - V T E A T R K L R P P L D P - - - A L L G V A R N A T D R E R L A N T E T L E S L A D H I V P F E R G G R T L V A A I G E L A W N T L A V T S A  
cxpl 56.5kDa|CPJU02089| D R Y G N D V L G V W K L N - - - A L N A S E I M M N T N R T V P V Q G I A D N M A N N I D I V N Q - - - V N Q L E V A S A G P Y E V L N R T E E M L V A S T H O I S L A M T Q R  
aeag 56.5kDa|AAEL009081| E R T T K V A V A V A L N - - - L F D S N T L S E A A K N T Y P V L Q A L A N I T S N I D A L Q R R - - - V R T L R V A T D P Y E V M N M T E M L V A A I R E A S L A M T Q R  
aealb 56.5kDa|AALF019776| E R T S K D G V S V A T L - - - M F D S N S V L G D A A N R T V P V L Q A L A L N I S T N F D A L E N L - - - V K T L R M A T D R P H V V L N M T E K A L N A V I R E T S L V L T Q R

anoga 55.3kDa|AGAP005822| V P G A D I Y A R Y N Y E F D K I P R L L I Y G S L V A G Q G E A R T Q S V G G L S G A L S L T Q A O L D A E T S N Y E O L G L V P G S S D V L K R O R I V L R G A E R  
anora 55.3kDa|AAR007686| V P G A D I Y A R Y N Y E F D K I P R L L I Y G S L V A G Q G E A R T Q S V G G L S G A L S L T Q A O L D A E T S N Y E O L G L V P G S S D V L K R O R I V L R G A E R  
anoqua 55.3kDa|AQUA011055| V P G A D I Y A R Y N Y E F D K I P R L L I Y G S L V A G Q G E A R T Q S V G G L S G A L S L T Q A O L D A E T S N Y E O L G L V P G S S D V L K R O R I V L R G A E R  
anome 55.3kDa|AMEM018002| V P G A D I Y A R Y N Y E F D K I P R L L I Y G S L V A G Q G E A R T Q S V G G L S G A L S L T Q A O L D A E T S N Y E O L G L V P G S S D V L K R O R I V L R G A E R  
anome 55.3kDa|AMEM005302| V P G A D I Y A R Y N Y E F D K I P R L L I Y G S L V A G Q G E A R T Q S V G G L S G A L S L T Q A O L D A E T S N Y E O L G L V P G S S D V L K R O R I V L R G A E R  
anochis 55.3kDa|ACHR005317| V P G A D S Y A R Y N Y E F D K I P R L L I Y G T L V A G Q G E A R T Q S V G S G L S G M L T V Q A O L D A E T M N Y N Q L N G L V P G S S D A L K O R S V L R G S E R  
anoepl 55.3kDa|AEPI006718| L P K A D T F S R F N Y E F D K I P R L L I Y S S S A G Q Q E V R T Q S V A S A L V G V L V Q V A Q L D S E T N Q Y N Q L N G V P S S D E L K L Q R V L Q G A O H  
anofun 55.3kDa|AFUN000965| V P R A D T F A R Y N Y E F D K I P R L L I Y G T L S S G Q Q E V R T Q S V A G A L A A Y L G V V Q A O L D A E T N Q Y T Q L N G V P S S D E L R L Q R A V L Q G A E R  
anomin 55.3kDa|AMINO11164| V P G A D T F A R Y N Y E F D K I P R L L I Y G T L S S G Q Q E V R T Q S V A S A L A Y L G V V Q A O L D A E T N Q Y N Q L N G V P S S S D E L R L Q R A V L Q G A E R  
anocul 55.3kDa|ACUA027649| V P G A D S F A K F N Y E D K I P R L L I Y G S L V G G E G E A R S L O S V A N A L V G Y L V Q V Q A O L N T S E A D Q Y N Q L S G L V P G S S A D A L K L Q R A V L Q G A E Q  
anoste 55.3kDa|ASTE007423| V P R A D T F A R F N Y E F D K I P R L L I Q G A L A A G Q E E T R T L Q S V A N A L A G Y L G V V Q A O L N T S E A D Q Y N Q L S G L V P G S S S D A L K R O R A L L R G A E Q  
anoste 55.3kDa|ADIR007794| V P R A D T F S R Y N Y E F D K I P R L L Y G L E G Q G D E M R T Q T V A G A L V G Y L V Q V Q A O L N T S E A R N Y N Q L N G L S A T S Y E L K L O R S V L W G A H R  
anoste 55.3kDa|ATE019916| V P R A Q T F S R Y N Y E F D K I P R L L Y G A D G Q G D E M R T Q N V G A C L A G Y L A V L Q A O L N T S E A R N Y N Q L N G L S A T S Y E L K L O R S V L W G A H R  
anosin 55.3kDa|ASIS012753| P Q A E G F R R Y Y E F D K L R A L Q L Y S L S G Q G G E A R A Q S V T A I G F L G V V Q T Q L D A E A R T Y G Q L G L G T A D S A D L K R O R R L V L E V A V Q  
anoalb 55.3kDa|AALB005741| P Q A E G F R R Y Y E F D K L R A L Q L Y S L S G Q G G E A R A Q S V T A I G F L G V V Q T Q L D A E A R T Y G Q L G L G S V N S T P E L K R O R A V L E V A V Q  
anodar 55.3kDa| -- K X N A D T F A R Y N Y E F D K I P R N Y Y S L S Y C L Y T T G S D L S A M S T M N F A T G F T R D V S Y E L S A I E G V N M I T Q Y S T D M T K Y Q A A T L N E A R N  
cxpl 56.5kDa|CPJU02089| V N R S D S F A Q V N L F D S I P R N Y Y S L S Y C L Y T T G S D L S A M S T M N F A T G F T R D V S Y E L S A I E G V N M I T Q Y S T D M T K Y Q A A T L N E A R N  
aeag 56.5kDa|AAEL009081| R N R S D S F A Q V N N L F D A I P R N Y Y P S L N G L Y T T V S D L S A M S A M N Y A T G F T R D M N Y E L A A E V E G V N M I T R Y S T D M T K Y Q A A T L N E A R N  
aealb 56.5kDa|AALF019776| R N R S D S F A Q V N N L F D A I P R N Y Y P S L N G L Y T T V S D L S A M S A M N Y A T G F T R D M N Y E L A A E V E G V N M I T R Y S T D M T K Y Q A A T L N E A R N

anoga 55.3kDa|AGAP005822| F S G V L G D A V V D A Q L S F A Q A L L O K E M S Y A E R H R O V R T S G H L M V A E V K R L W S S I A N C L S - - - - -  
anora 55.3kDa|AAR007686| F S G V L G D A V V D A Q L S F A Q A L L O K E M S Y A E R H H Q C V R T S G H L M V A E V K R L W S S I A N C L S - - - - -  
anoqua 55.3kDa|AQUA011055| F S G V L G D A V V D A Q L S F A Q A L L O K E M S Y A E R H H Q C V R T S G H L M V A E V K R L W S S I A N C L S - - - - -  
anome 55.3kDa|AMEM018002| F S G V L G D A V V D A Q L S F A Q A L L O K E M S Y A E R H H Q C V R T S G H L M V A E V K R L W S S I A N C L S - - - - -  
anome 55.3kDa|AMEM005302| F S G V L G D A V V D A Q L S F A Q A L L O K E M S Y A E R H H Q C V R T S G H L M V A E V K R L W S S I A N C L S - - - - -  
anochis 55.3kDa|ACHR005317| F S R I L G D A V V D A Q R S A F A L L O K E M S Y A E R H H Q C V R A S D O L M I A E V K L W T S I A V M N - - - - -  
anoepl 55.3kDa|AEPI006718| L S Y I W G N I V V D N Q L K A F E I M O D E I G S Y A E R H H Q C V R T S Y L L M A A E I K W S A I A N C L N - - - - -  
anofun 55.3kDa|AFUN000965| I S D I W G G A V V D N Q L N A F E G L M H D E V N S Y A E R H H Q C V R T S D Q L M I A E V K N L W S T V V N L D - - - - -  
anomin 55.3kDa|AMINO11164| I S D I W G G T V V D N Q L S A F E G L M H D E V N S Y A E R H H Q C V R T S D Q L M I A E V K N L W S A I A S L H - - - - -  
anocul 55.3kDa|ACUA027649| L S A I W G D T V V D N Q L S A F E E L V R E E V G S A T R H Y Q C V R T S D Q L L L T E V R S L W R I A I A G F S - - - - -  
anoste 55.3kDa|ASTE007423| F S H Q L G S Y V N D Q L A F E E L R H Q E M S Y A E R H R E Q V R S D R I M V A E V R N L W S S I A N C L S - - - - -  
anoste 55.3kDa|ADIR007794| F S R E L G G A V V N D L T A F A V L O Q E V K I A E R H H Q C V R T S D H L M I A E V R S L W S S I A K L N N T A T - - - - -  
anoste 55.3kDa|ATE019916| F S E L I G S H M V D N I G A F Q E L L D E M R Y S A R Y N A C L H V T E R M S V A V V I D L S N S I A K L N N T A T - - - - -  
anosin 55.3kDa|ASIS012753| Y S Q L V G G T V V A N Q L A S F D G L O R E L G Y S M D R H G A C L L G S Y R L L V T E V A Y L G N S L A A L N P S T R - - - - -  
anoalb 55.3kDa|AALB005741| Y Q L V G G T V V A N Q L A S F G E E L O R E L G Y S A R H G A C L L G S Y R L L V T E V A Y L R N S L A A L T P P F - - - - -  
anodar 55.3kDa| -- Y - - - L A N R Q V P L Q Q L V Q R M F K E V S Y A E R Y N F L T T L L H Q S Y A Q S F R L Y E L I N E I L N I V P T V T P M R K W - Y G K L T I G F P K  
cxpl 56.5kDa|CPJU02089| Y - - - L A N R Q V Y V Q I A N Y Q K L L E N E V A S A G R Y D Y L A N S M R Q A Q T M I N Y L R G T F G G V G M A P A V T P Y K F R I G K V T R F G  
aeag 56.5kDa|AAEL009081| F - - - I S G R R Y V Q Q I A N Y Q K L L E N E V A S A G R Y D Y L A N S M R Q A Q T M I N Y L R G T F G G V G M A P A V T P Y K F R I G K V T R F G  
aealb 56.5kDa|AALF019776| F - - - I S G R R Y V Q Q I A N Y Q K L L E N E V A S A G R Y D Y L A N S M R Q A Q T M I N Y L R G T F G G V G M A P A V T P Y K F R I G K V T R F G
