# Supplementary material for: Anopheline salivary protein genes and gene families: an evolutionary overview after the whole genome sequence of sixteen Anopheles species
Source: PubMed Central journal article supplement (PMC5307786; doi:10.1186/s12864-017-3579-8), 2017-02-13
Supplement: 12864_2017_3579_MOESM14_ESM.pdf [file 12864_2017_3579_MOESM14_ESM.pdf]

|                         |                                                                                                       |
|-------------------------|-------------------------------------------------------------------------------------------------------|
| anoga SG6 AGAP000150    | - - - - - E K V W V D R D N V Y C G H L D C T R V A T F K G E R F C T L C D T R H F C E C K E         |
| anocol SG6 ACOM040125   | - - - - - E K V W V D R D K V Y C G H L D C T R V A T F K G E R F C T L C D T R H F C E C K E         |
| anoara SG6 AARA001017   | - - - - - E K V W V D R D K V Y C G H L D C T R V A T F K G E R F C T L C D T R H F C E C K E         |
| anoqua SG6 AQUA002523   | - - - - - E K V W V D R D K V Y C G H L D C T R V A T F K G E R F C T L C D T R H F C E C K E         |
| anomer SG6 AMEM011397   | - - - - - E K V W V D R D N V Y C G H L D C T K V A T F K G E R F C T L C D T R H F C E C K E         |
| anomel SG6 AMEC001483   | - - - - - E K V W V D R D K V Y C G H L D C T R V A T F K G E R F C T L C D T R H F C E C K E         |
| anochris SG6 ACHR005518 | - - - - - E K V W V D R D Q V Y C G H I D C T K V A T F K G E R F C S P C D T R H F C E C K E         |
| anoepi SG6 AEPI010446   | - - - - - E K V W V D R D K V Y C E H I D C T K V A T F K G E R F C S P C D T R H F C E C K E         |
| anofun SG6 AFUN003883   | - V G G P Y A T A E K V W V D R D Q V Y C G H I D C T R V A T F K G E R F C S P C D T R H F C E C K E |
| anomin SG6 AMIN005447   | - - - - - E K V W V D R D R V Y C G H I D C T R V A T Y K G E R F C S P C D T R H F C E C K E         |
| anocol SG6              | - - - - - E K V W V D R D K V Y C S H I D C R Y D A T Y K G E R F C T L C D T Q H F C E C K E         |
| anoste SG6 ASTE000264   | Q T S G P Y A A A E K V W V D R D K V Y C E H I D C T R V A T Y K G E R F C S P C D T R H F C E C K E |
| anomac SG6 AMAM005167   | Q S G G P Y A T A A K V W V D R D K V Y C E H I D C T R L A T F K G E R F C S P C D T R H F C E C K E |
| anofar SG6 AFAF016250   | - - - - - D D G I D Q D K V F C G H L D C R K I A T Y K K E K F C N P C D N R H Y C E C V E           |
| anodir SG6 ADIR000828   | - - - - - Q T W I D R D K T Y C E H I D C T K L A K Y K G E K F C S P C D T R H Y C E C K E           |
| anoatro SG6 AATE009364  | - - - - - Q E K Q K Q W I D R D S V Y C G H I D C T K L A T F K G E K F C S P C D T H H Y C E C K E   |
| anosin SG6 ASIS003087   | - - - - - E K Q K Q W I D R D A V Y C G H I D C T K L A T F K G E K F C S P C D T E H Y C E C K E     |

. : \* : \* . : \* \* : \* \* \* . : \* \* : \* \* . \* \* . . \* : \* \* \* \*

|                         |                                                                                                       |
|-------------------------|-------------------------------------------------------------------------------------------------------|
| anoga SG6 AGAP000150    | T R E P L P Y M Y A C P G T E P C Q S S D R L G S C S K S M H D V L C D R I D Q A F L E Q - - - - -   |
| anocol SG6 ACOM040125   | T R E P L P Y M Y A C P G T E P C Q S S D R L G S C S K S M H D V L C D R I D Q A F L E Q - - - - -   |
| anoara SG6 AARA001017   | T R E P L P Y M Y A C P G T E P C Q S S D R L G S C S K T M H D V L C D R I D Q A F L E Q - - - - -   |
| anoqua SG6 AQUA002523   | T R E P L P Y M Y A C P G T E P C Q S S D R L G S C S K T M H D V L C D R I D Q A F L E Q - - - - -   |
| anomer SG6 AMEM011397   | T R E P L P Y M Y A C P G T E P C Q S S D R L G S C R K T M H D E L C N R I D Q A F L E Q - - - - -   |
| anomel SG6 AMEC001483   | T R E P L P Y M Y A C P G T E P C Q S S D R L G S C S K S M H D V L C D R I D Q A F L E Q - - - - -   |
| anochris SG6 ACHR005518 | T L E S L P Y M Y A C P G T E P C Q T S D R R G S C T K T M H D D L C N L I D K P F L E Q - - - - -   |
| anoepi SG6 AEPI010446   | T R E P L P Y M Y A C P G T E P C Q T S D R R G A C T K T M R D E L C S L I D K P F L E Q - - - - -   |
| anofun SG6 AFUN003883   | T L E S L P Y M Y E C P G T E P C Q T S D R R G T C Q K T M H D E L C S L I D K P F L E Q - - - - -   |
| anomin SG6 AMIN005447   | T A E P L P Y M Y E C P G S T P C Q T S D R R G T C Q T T M E D K L C S L I D K P F L E Q - - - - -   |
| anocol SG6              | I K E S L P Y M Y A C P G S E P C K T S D R R G N C Q K T M D D K L C S Q I D K P F L E - - - - -     |
| anoste SG6 ASTE000264   | T K E S L P Y M Y A C P G T E P C Q T S D R R G S C Q T M S D E L C S R I D Q A F L E A - - - - -     |
| anomac SG6 AMAM005167   | T K E S L P Y M Y A C P G M E Q C Q T S D R R G S C Q K T M S D E L C N R I D L A F L E Q I E D Y V I |
| anofar SG6 AFAF016250   | T S E S L P Y L R S C S G S T E C Q T R D R L G R C Q K T L S D D K C K L I D - - - - -               |
| anodir SG6 ADIR000828   | V R E S L P Y L G T C P G S G E C Q K T D S R G K C E K T L H N N L C S L I D K P Y M - - - - -       |
| anoatro SG6 AATE009364  | T R E P L P Y L Q A C K G - G A C Q S T D R R G S C S R T M R D D L C S H I D E A F R Y L - - - - -   |
| anosin SG6 ASIS003087   | T K E S L P Y M Y K C P G S G A C Q T T D R R G A C R R T M D D D L C S H I D E A Y R Y L - - - - -   |

\* \* \* \* : \* \* \* \* : \* : . \* \* \* \* : : : \* . \* \*
