# Supplementary material for: Anopheline salivary protein genes and gene families: an evolutionary overview after the whole genome sequence of sixteen Anopheles species
Source: PubMed Central journal article supplement (PMC5307786; doi:10.1186/s12864-017-3579-8), 2017-02-13
Supplement: 12864_2017_3579_MOESM15_ESM.pdf [file 12864_2017_3579_MOESM15_ESM.pdf]

(A)

|                             |                                                                                                                                     |
|-----------------------------|-------------------------------------------------------------------------------------------------------------------------------------|
| anoga SG7 AGAP008216        | - - - - S A N H V Q Q L M K V F R S M V Q N F D Y T K K P T Y L Q R A K Y G V Q N Q L R N P L V Q K A G N L P K S A K L S - - -     |
| anocol SG7 ACOM030344       | - - - - - N H V Q Q L M K V F R S M T Q N F D Y T K K P S Y L Q R A K Y G V Q N Q L R N P L V Q K A G N L P K S A K L S - - -       |
| anoara SG7 AARA004918       | - - - - - S A N H V Q Q L M K V F R S M V Q N F D Y T K K P S Y L Q R A K Y G V Q N Q L R N P L V Q K A G N L P K S A K L S - - -   |
| anoqua SG7 AQUA010544       | - - - - - A N H V Q Q L M K V F R S M A Q N F D Y T K K P F Y L Q R A K Y G V Q N Q L R N P L V Q K A G N L P K S A K L S - - -     |
| anomer SG7 AMEM013747       | - - - - - S A N H V Q Q L M K V F R S M T Q S F D Y T K K P F Y L Q R A K Y G V Q N Q L R N P L V Q K A G N L P K S A K L S - - -   |
| anomet SG7 AMEC001237       | - - - - - N H V Q Q L M K V F R S M T Q N F D Y T K K P F Y L Q R A K Y G V Q N Q L R N P L V Q K A G N L P K S A K L S - - -       |
| anochris SG7 ACHR008117     | - - - - - S T N H V Q Q L M K V F R S L T Q N F D Y T K K S F Y L Q R A K Y G V Q N Q M R N P L V S K A S H F P E N A K L S - - -   |
| anoepi SG7 AEP1005590       | T P S K A L G T H V Q Q L M K V F R G L M N D I D Y T K K P F Y V Q R A K Y G V Q N Q L R N P L V A R A A S F S R N S K L S - - -   |
| anofun SG7 AFUN010916       | - - - - - A G K H V L Q L M K L F R D L - - D F D W S K K P F Y L N R A K Y G V Q N Q L R Q P L S T K A L S F P T T A K L S - - -   |
| anomin SG7 AMIN006065       | - - - - - T G K H V Q Q L M K L F R G L - - D F D W S K K P F Y L H R A K Y G V Q N Q L R N P L T K A L S F P K T V K L S - - -     |
| anocol SG7 ACUA005709       | - - - - - G G Q H V Q Q L M K L F R G M - - E F D W S K K P F Y L H R A K Y G V Q N Q L R N P L T K A M S L P R S A K L S - - -     |
| anoste SG7 ASTE005068       | - - - - - T G K H V Q Q L M K V F R A I - - D F D T T K K A F Y L H R A K Y G V Q N Q L R N P L V G K V Q N L P D S A T L S - - -   |
| anovac SG7 AMAM002523       | - - - - - A G K H V Q Q L L K L F R G I - - D F D T T K K P F Y L H R A K Y G V Q N Q L R T P L T T K A M S L P R S A T L S - - -   |
| anofar SG7 AFAF011308       | - - - - - S N R H A R K L F E T I R R S I - - Q F D F T K R P V Y L H R A K Y G L Q N Q L R N P L V G K V Q N L P D S A T L S - - - |
| anoatro SG7 AATE014342      | - - - - - T T K H G R E L L K T F R R I - - D F D E T R K S I Y L L S A K F G V Q S Q L R D P L M Q R V L N Y W D D V K L S - - -   |
| anosin SG7 ASIS019540       | - - - - - T N K H A G E L L K A F R R I - - D F D W T K K S F Y L Q S A K Y G V Q V Q L R E P L V K K A L G Y L S D D V N L S - - - |
| anosin SG7 AALB001854       | - - - - - A N N H I R T V L K L F R T I - - D L D S K K S F Y L T A A K Y G I Q T Q L R E P I R I V G G Y L P S T K L S - - -       |
| anodar SG7 Calvo et al 2009 | - - - - - A H S H I R K V L Q L F R S I - - E L D D S K K S F Y L T A A K Y G I Q T Q L R E P I R V L V G G F A P S T K L S - - -   |
| anoga SG7-2 AGAP008215      | - - - - - G P R H A K Q L I S Y F K R M - - K L D Q T K N R V Y Q H D V K N G L R V H L R G P L L Q K A L C L P K G T K L S - - -   |
| anocol SG7-2 ACOM030347     | - - - - - T P R H A K Q L I S Y F K R M - - K L D Q T K N R V Y Q H D V K N G L R V H L R G P L L Q K A L C L P K G T K L S - - -   |
| anoara SG7-2 AARA004918     | - - - - - T P R H A K Q L I S Y F K R M - - K L D Q T K N R V Y Q H D V K N G L R V H L R G P L L Q K A L C L P K G T K L S - - -   |
| anoqua SG7-2 AQUA010544     | - - - - - S P R H A K Q L I S Y F K R M - - K L D Q T K N R V Y Q H D V K N G L R V H L R G P L L Q K A L C L P K G T K L S - - -   |
| anomer SG7-2 AMEM004830     | - - - - - G P R H A K Q L I S Y F K R M - - K L D Q T K N R V Y Q H D V K N G L R V H L R G P L L Q K A L C L P K G T K L S - - -   |
| anomet SG7-2 AMEC014046     | - - - - - G P R H A K Q L I S Y F K R M - - K L D Q T K N R V Y Q H D V K N G L R V H L R G P L L Q K A L C L P K G T K L S - - -   |
| anochris SG7-2 ACHR008118   | - - - - - T P W H A K Q L V P Y F R R M - - K L D Q T K N R V Y Q H D V K N G L R M H L R S P L L Q K A L C L P K G T K L S - - -   |
| anoepi SG7-2 AEP1005590     | - - - - - T T W H A K H L M P Y F R R M - - K L D K S K N R V Y Q H D V K Y G L R M H L R A P L L Q K A L C L P K G T K L S - - -   |
| anofun SG7-2 AFUN010916     | - - - - - T Q W H S K Q L L P Y F R R I - - Q L D K T K N S V Y Q H T V K D A I R M H L R I P L M Q K A L C L P K G T K L S - - -   |
| anomin SG7-2 AMIN006065     | - - - - - T S E H A K Q L Q P Y F R R F - - K L D K T K N S V Y Q H I V K D G L R M H L R L P L L Q K A L C L P K G T K L S - - -   |
| anocol SG7-2 ACUA017716     | - - - - - T P W H A K Q L L P Y F Q R F - - K L D K T K N S V Y Q H I V K D A I R M H L R L P L L Q K A L C L P E G T K L S - - -   |
| anoste SG7-2 ASTE005068     | - - - - - T P W H A K R Q L L Y F R R I - - R L D K T K N S V Y Q D D V K I G I R R H L R A P L V Q K A L C L P K G T K L S - - -   |
| anofar SG7-2 AFAF019215     | - - - - - T L W H G K Q V M Q Y F Q R V - - Q L D K T K N R V Y L L D V K R G V R L N L R G P L F Q N A L C L P H G T K L S - - -   |
| anodir SG7-2 ADIR006362     | - - - - - T P W H A A Q V R Q Y F K R I - - K L D K T K N Q V Y L H D V K R G I R T Q L R N P L L Q K A L C L M Q E T Q L S - - -   |
| anoatro SG7-2 AATE006599    | - - - - - T F Q H A K E V L Q Y F K R V - - R L D K T K N S V Y Q S V R Y G I R N V L R N P L L A K A G C L K R E V K L S - - -     |
| anosin SG7-2 ASIS020198     | - - - - - T F Q H A K A D V L E Y F R R I - - R L D K T K N S V Y K S Y V Q K G V R N I L R N P L L Q K A G C L L K E V N L S - - - |
| anosin SG7-2 ASIS020198     | - - - - - T F Q H A K A D V L E Y F R R I - - R L D K T K N S V Y K S Y V Q K G V R N I L R N P L L Q K A G C L L K E V N L S - - - |
| anodal SG7-2 AALB001854     | - - - - - T H E H A K M K M T N Y F K R I - - R L D K T K N A V Y Q D Y V Q K G I K T L K D P L L Q K A M L L P A S K S L P - - -   |
| anoga SG7-3 AGAP013724      | - - - - - T P S H S Q Q L L S Y F K R M - - K L D K T K N R V Y L D D V E Y G L R T N L R R P L L Q N A L F L P K G T K M S V F S   |
| anocol SG7-3 ACOM030347     | - - - - - T P S H S Q Q L L S Y F K R M - - K L D K T K N R V Y L D D V E Y G L R T N L R R P L L Q K A L F L P K G T K V S V F S   |

|                             |                                                                                                                                       |
|-----------------------------|---------------------------------------------------------------------------------------------------------------------------------------|
| anoga SG7 AGAP008216        | D G C L K Q M V A R V T D L E A S F Y A S F S Y N C H D H - D Q Y S M E C L E A A E P K Y L D G L K T L A D E T A Q C L R D Q Q -     |
| anocol SG7 ACOM030344       | D G C L K Q M V A R V T D L E A S F Y A S F S Y N C H D H - D Q Y S M E C L E A A E P K Y L D G L K T L A D E T A Q C L R D Q Q -     |
| anoara SG7 AARA004918       | D A C L K Q M V A R V T D L E A S F Y A S F S Y N C H D H - D Q Y S M E C L E A A E P K Y L D G L K T L A D E T A Q C L R D Q Q -     |
| anoqua SG7 AQUA010544       | D A C L K Q M V A R V T D L E A S F Y A S F S Y N C H D H - D Q Y S M E C L E A A E P K Y L D G L K T L A D E T A Q C L R D Q Q -     |
| anomer SG7 AMEM013747       | D A C L K Q M V A R V T D L E A S F Y A S F S Y N C H D H - D Q Y S M E C L E A A E P K Y L D G L K T L A D E T A Q C L R D Q Q -     |
| anomet SG7 AMEC001237       | E A C L K Q M V A R V T D L E A S F Y A S F S Y N C H D H - D Q Y S M E C L E A A E P K Y L D G L K T L A D E T A Q C L R D Q Q -     |
| anochris SG7 ACHR008117     | D A C L K Q M V A R V T D L E A S F Y A S F S Y N C H D H - D Q Y S M D C L E A A E P A Y L T G L K A V A E E T T Q G C L R E Q -     |
| anoepi SG7 AEP1005590       | D A C L K Q M V T K A K D L E E D T F Y A G F S Y N C H D H - D Q Y S M E C L E A A E P A Y L T G L K A V A E E T T Q G C L R E Q -   |
| anofun SG7 AFUN010916       | D S C L K Q M V T K A K D L E E S F Y A G F S Y N C H E H - D Q Y S M D C L E A A E P E Y L N G L K K L A A S T E T E K C L V Q K -   |
| anomin SG7 AMIN006065       | Q G C L M K M I T K V K D L E E G S F Y A G F S Y N C H E H - D Q Y S M D C L E A A E P E Y L N G L K K L A A S T E T E K C L V Q K - |
| anocol SG7 ACUA005709       | Q E C L N Q M V T Q V K D L E E G S F Y A G F S Y N C H E H - D Q Y S M D C L E A A E P E Y L N G L K K L A A S T E T E K C L V Q K - |
| anoste SG7 ASTE005068       | Q P C L K K M I D E V N D L E S T F Y A G F S Y N C H D H - D Q Y S M D C L E A A E P E Y L N G L K K L A A S T E T E K C L V Q K -   |
| anovac SG7 AMAM002523       | Q P C L K K M I N E V N D L E S T F Y A G F S Y N C H D H - D Q Y S M D C L E A A E P E Y L N G L K K L A A S T E T E K C L V Q K -   |
| anofar SG7 AFAF011308       | S A C L Q Q M V K K V Y D L E K T F Y A G F S Y Y C E G H - V Q Y S I E C L E A A E P A Y L N G L V A L E G E T T E K C L V T K -     |
| anoatro SG7 AATE014342      | K T C L D R M V A K V D D V K E T F Y A G F S Y A C K D H - D Q Y S V D C L E A A K P S Y L T A L V D I R T E T T E N C L T S N N K   |
| anosin SG7 ASIS019540       | T P C L N Q M V T K V H D L E D T F Y A G F S Y G C E I P D Q Q Y T V E C L E A A K P N Y L N G L L E E L R S E T T E K C L E A E -   |
| anosin SG7 AALB001854       | E A C V K N M I S E V Y E I E G D F Y A K F S Y A C E D H - A P Y S V E C L E A A R D D Y L T Q L V L V E L F K E T T K K C L R E -   |
| anodal SG7 Calvo et al 2009 | E A C V K N A I A R I Y E I E G D F Y A K F S Y A C E N H - D P Y S V E C L E A A Q D D Y L T K L V L V E L F K E T T K K C L R E -   |
| anoga SG7-2 AGAP008215      | S D C L N R M V D K A R Q H E N K F Y A Q F T Y A C K T N - A E Y S A K C L D S G R P V Y Y H A L Q K L A K E T T E R C W K L -       |
| anocol SG7-2 ACOM030347     | S D C L N R M V D K A R Q H E N K F Y A Q F T Y A C K T N - A E Y S A K C L D T G R P V Y Y H A L Q K L A K E T T E R C W K L -       |
| anoara SG7-2 AARA004918     | S D C L N R M V D K A R Q H E N K F Y A Q F T Y A C K T N - A E Y S A K C L D T G R P V Y Y R A L K K L A K E T T E R C W K L -       |
| anoqua SG7-2 AQUA010544     | S D C L N R M V D K A R Q H E N K F Y A Q F T Y A C K T N - A E Y S A K C L D S G R P V Y Y R A L K K L A K E T T E R C W K L -       |
| anomer SG7-2 AMEM004830     | S D C L N R M V D K A R Q H E N K F Y A Q F T Y A C K T N - A E Y S A K C L D S G R P V Y Y R A L K K L A K E T T E R C W K L -       |
| anomet SG7-2 AMEC014046     | S D C L N R M V D K A R Q H E N K F Y A Q F T Y A C K T N - A E Y S A K C L D T G R P V Y Y R A L K K L A K E T T E R C W K L -       |
| anochris SG7-2 ACHR008118   | S D C L N R M V D K A R Q H E N K F Y A Q F T Y A C K R N - A E Y S A D C L D S G R P L Y Y R A L K N L V K E T T E R C W K F -       |
| anoepi SG7-2 AEP1005590     | S D C L N R M V D K A R Q H E N K F Y A Q F T Y A C K Q H - A E Y S A D C L D S G R P V Y Y R D L K N L A K E T T E Q C W K L -       |
| anofun SG7-2 AFUN010916     | S D C L N R M V D K A R Q H E N K F Y A R F T Y A C K T H - A E Y S S D C M E S G R P M Y Y R N L R N L V K Q T E T E K C W K L -     |
| anomin SG7-2 AMIN006065     | S D C L N R M V D K A R Q H E N K F Y A R F T Y A C K K H - A E Y S S D C L D S G R P M Y Y R A L R N L V K E T T V N C W K L -       |
| anocol SG7-2 ACUA017716     | S D C L N R M V D K A R Q H E N K F Y A R F T Y A C K K N - A E Y S S S C L E S G R P M Y Y R A L R N L V K E T T V K C W K L -       |
| anoste SG7-2 ASTE005068     | S D C L Y K M V D K A R Q H E N K F Y A R F T Y A C K Q H - T E Y S A D C L E S G R P L Y Y Q A L Q N L V K E T T L K C W K L -       |
| anofar SG7-2 AFAF019215     | S D C L N R M V D K A R Q H E N K F Y A K F T Y A C K G H - A E Y S S A C L E K A R P E Y Y R A L K N L A K E T T I Q C L K V K -     |
| anodir SG7-2 ADIR006362     | S D C L N R M V D K A R Q H E N K F Y A K F T Y A C K G H - P E Y S A V C L E T A R P Q Y Y R N L R K L A K E T T I K C W T L K -     |
| anoatro SG7-2 AATE006599    | T D C L N R M V D R A R Q H E N K F Y A K F T Y A C K G H - A E Y S A E C L E S A R P K Y Y R N L K A L V A Q T E T E K C W K L -     |
| anosin SG7-2 ASIS020198     | S D C L N R M V D K A R Q H E N K F Y A K F T Y A C K G H - A E Y S A A C L E F A R P K Y Y R N L R A L V A Q T E T E K C W K L -     |
| anosin SG7-2 ASIS020198     | S D C L N R M V D K A R Q H E N K F Y A V F T Y A C Q D H - I P T A F P C L E K G V A T Y Y E N L K A L A E K S T E T E K C N M -     |
| anodal SG7-2 AALB001854     | D D C L N A M V D E A R E H E N K F Y A V F T Y A C Q D H - I P T A F P C L E K G V A T Y Y E N L K A L A E K S T E T E K C N M -     |
| anoga SG7-3 AGAP013724      | S D C L N R M V D K A R Q H E N K F Y A Q F T Y A S K T N - A E Y S S D C L D T G R P V Y Y R D L K K L A K E T T E Q C W K L -       |
| anocol SG7-3 ACOM030347     | S D C L N R M V D K A R Q H E N K F Y A Q F T Y A C K K N - A E Y S S D C L D T G R P V Y Y R D L K K L A K E T T E Q C W K L -       |

(B)

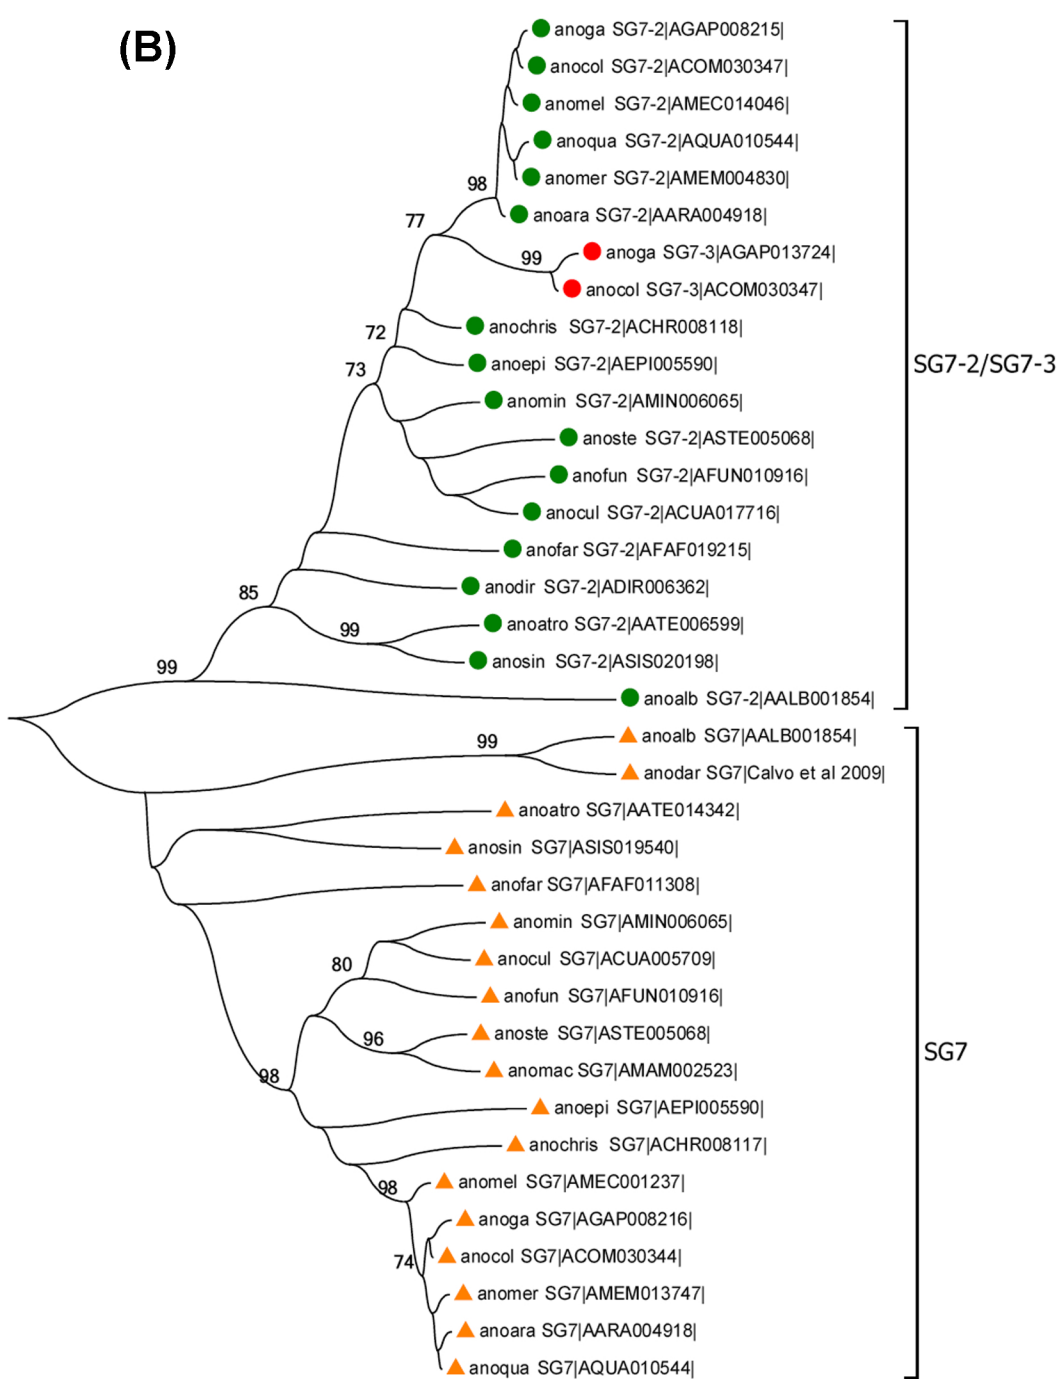

0.1

(C)

30kDa  
gSG7  
gSG7-2  
gSG7-3

```
---MKFLLLVASVLCVLIVSARPADDTSDQESSTELSEDAGAEEGAEDAGSDAEADAGAADGEEGATD  
MHAKPAFVLIALGVICLLQTTPTSA SANHVQQ-----  
MTIKLCWVFAALGLIWLQISPCDAGPRHAKQ-----  
MSIKLCWVLAALGLICLLQISPSSEGT PSHSQQ-----  
: : : . . : : * :  
: *
```

30kDa  
gSG7  
gSG7-2  
gSG7-3

```
TESGAEGDDSEMDSAMKEGEEGAGSDDAVSGADDETEESKDDAEEDSEEGGEEGGDGASGGEGGEKESPR  
-----  
-----  
-----
```

30kDa  
gSG7  
gSG7-2  
gSG7-3

```
NTYRQVHKLLKKIMKVDTKDKYLKSFVVGRLLQERLMNPTIDLVTIEKYSKI---KECFSSLDKDVSAM  
--LMKVFRSMVQNFDYTKKPTYLQRA-KYGVQNLRNPLVQKAGNLPKSAKL---SDGCLKQMVARVTDL  
--LISYFKRMK--LDQTKNRVYQHDV-KNGLRVHLRGP LLQKALCLPKGTKL---SSDCLNRMVDKARQH  
--LLSYFKRMK--LDKTKNRVYLDLV- EYGLR TNLRRP LLQNALFLPKGTKMSVFSDDCLNRMVDKARQH  
: : : : : : * : : : * * : : : * : * : : * : : : : *
```

30kDa  
gSG7  
gSG7-2  
gSG7-3

```
VKE--SEKSYEECSKDKTNTSCGTEGTRELDLGLIEREQELSDCIVDKRDAE  
EASFYASFSYNCHDHDQYSMECLEAAEPKYLDGLKTLAETAQCLRDQQ---  
ENKFYAQFTYACKTNAEYSAKCLDSGRPVYYHALQKLAKETERCWKL-----  
ENKFYAQFTYASKTNAEYSSDLDTGRPVYYRDLKKLAKETEQCWKL-----  
: : : * : : : * : : : * : * : : *
```
