# Supplementary material for: Anopheline salivary protein genes and gene families: an evolutionary overview after the whole genome sequence of sixteen Anopheles species
Source: PubMed Central journal article supplement (PMC5307786; doi:10.1186/s12864-017-3579-8), 2017-02-13

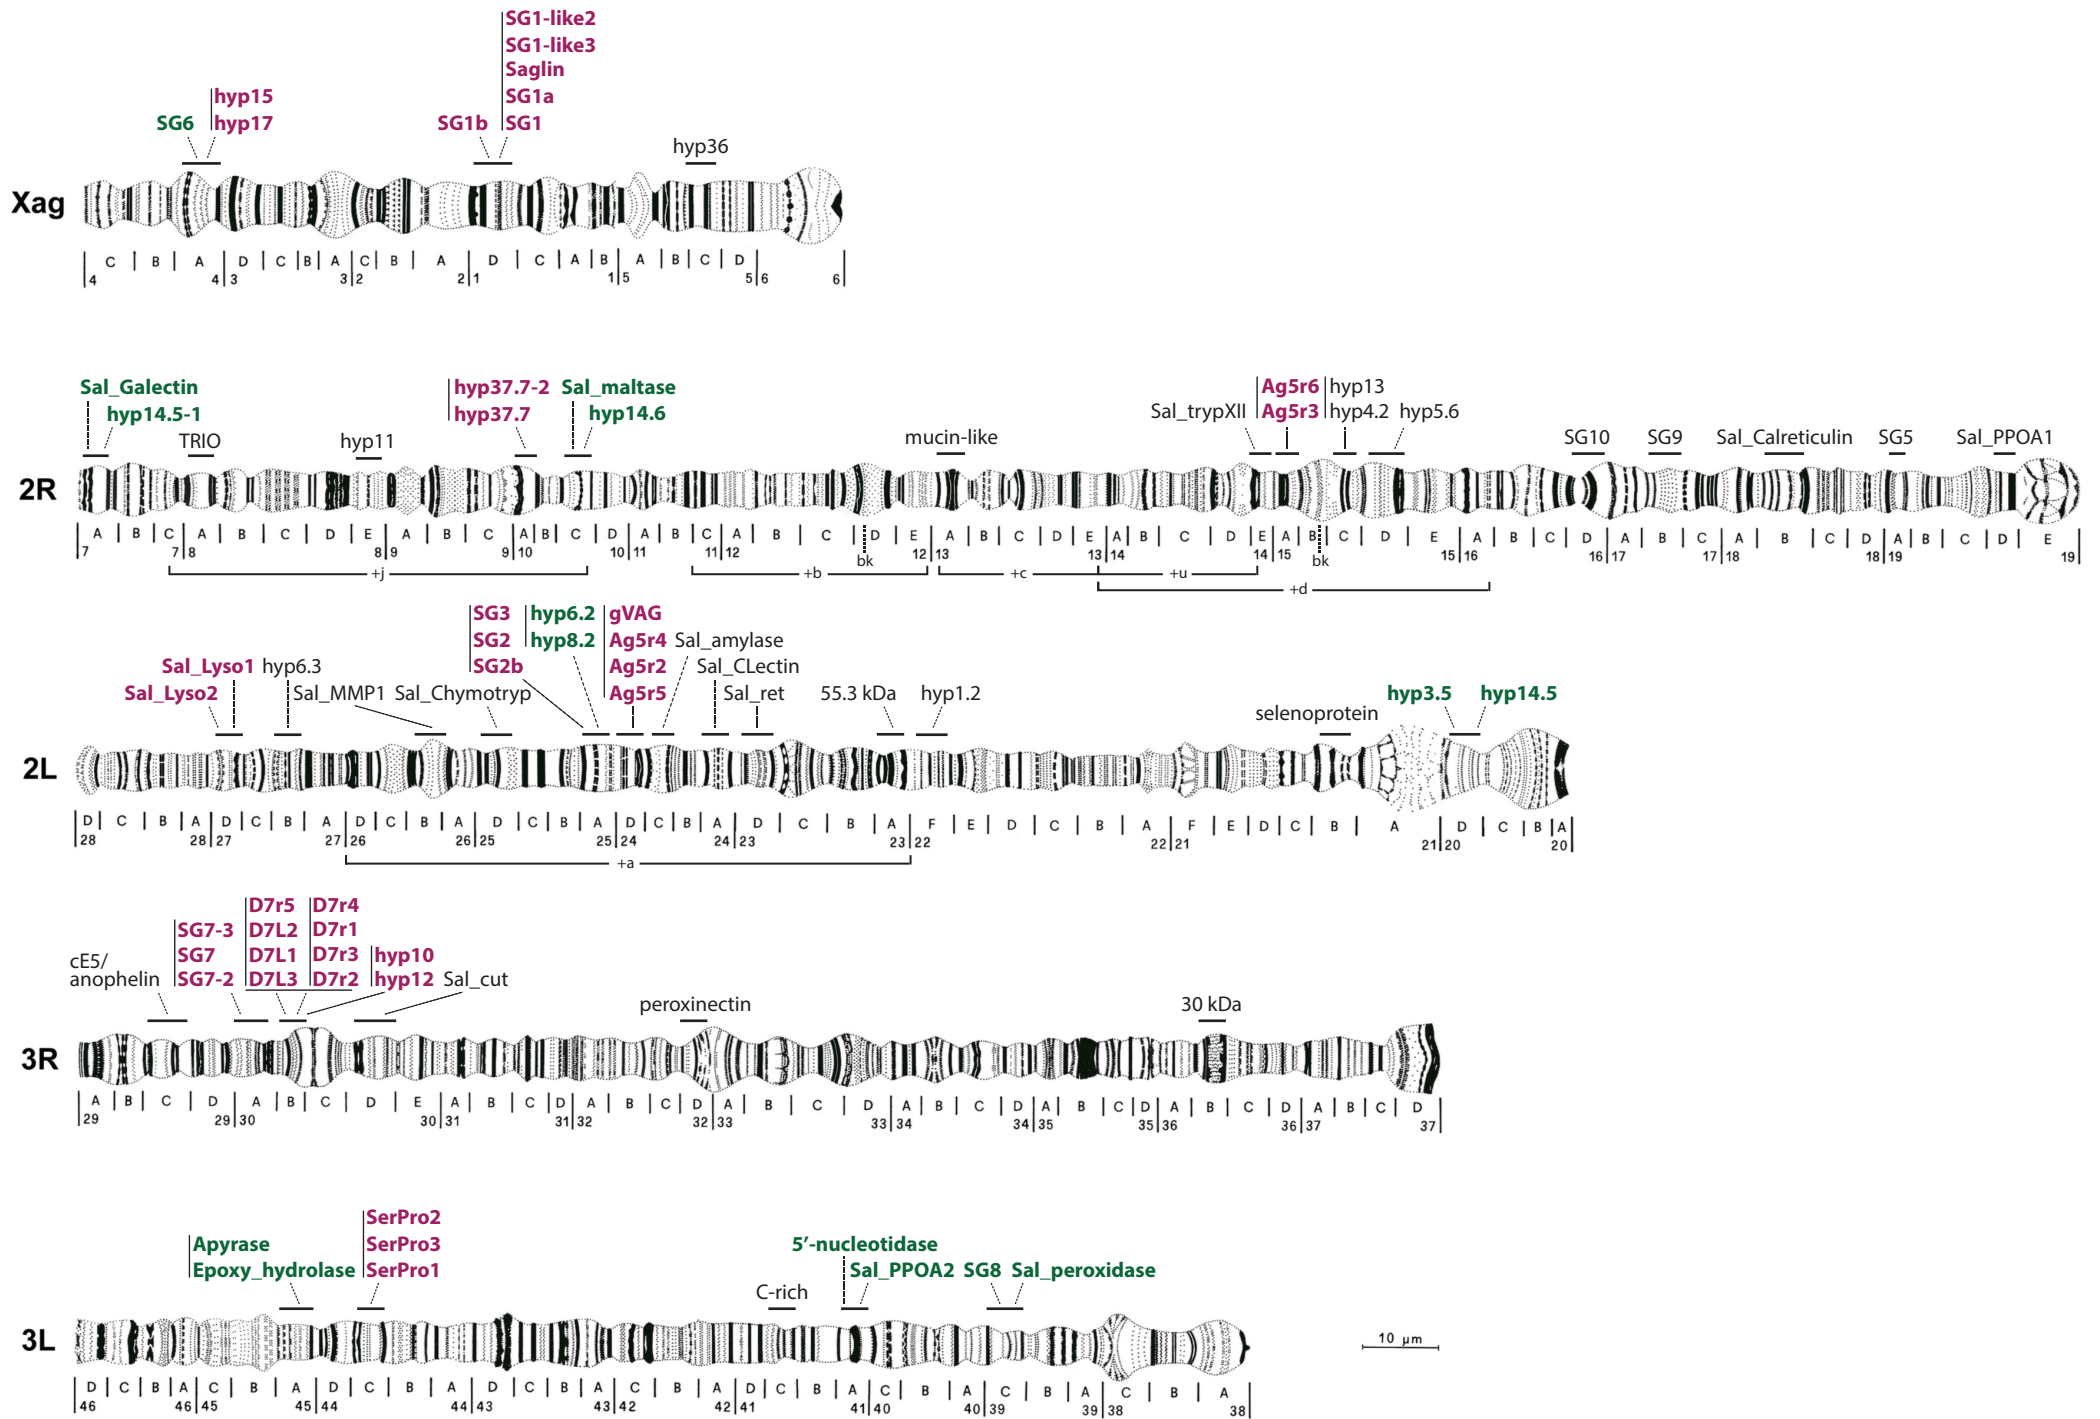

Supplement: 12864_2017_3579_MOESM17_ESM.pdf [file 12864_2017_3579_MOESM17_ESM.pdf]
