# Supplementary material for: Anopheline salivary protein genes and gene families: an evolutionary overview after the whole genome sequence of sixteen Anopheles species
Source: BMC Genomics. 2017 Feb 13;18:153. doi: 10.1186/s12864-017-3579-8 (PMC5307786; doi:10.1186/s12864-017-3579-8)
Supplement: Additional file 6: — Alignment of the anopheline Sal_trypXII. Multiple alignment of the anopheline mature salivary serine protease Sal_trypXII. Conserved cysteines (red), fully conserved residues (yellow) and the catalytic triad H, D, S (orange) are highlighted. The conserved (K/R)GD motif is boxed. Residues identical in at least 75% of the aligned sequences are shown in green. Species names are abbreviated as in Additional file 5 and followed by VectorBase accession numbers (when available). (PDF 74 kb) [file 12864_2017_3579_MOESM6_ESM.pdf]

[illegible]

-----TVERLPIVETHLLDSYNPVTMGDIALLRALPTTPSSKP--EGDT-QSTLRLPNDTYRTAANGELC  
 -----TVERLPIVETHLLDSYNPVTMGDIALLRALPTTPSSSTP--EGDR-QSMLRPNNDTYRTAANGELC  
 -----TVERLPIVETHLLDSYNPVTMGDIALLRALPTTPSSSKP--EGDT-QSMLRPNNDTYRTAANGELC  
 -----TVERLPIVETHLLDSYNPVTMGDIALLRALPTTPSSKP--ESDP-RSMLRPNNDTYRTAANGELC  
 -----TVERLPIVETHLLDSYNPVTMGDIALLRALPTTPSSKL--EDDP-RSMLRPNNDTYRTAANGELC  
 -----TVHRLPIVETHLPDSYNPVTMGDIALLRALPTTT-GKP--KTGT-QSTLRPNDESYSRTAANGELC  
 -----SVQRLPIVETHILLSYNPVTMGDIALLRAVLPNRSSTGTS--GTQLQSSILRPNDESYSRTAANGELC  
 -----SADRPPIVETHILRSYNPVTMGDIAMLRALPIAHKFQS--DPQAPLRPNDESYHTIANGELC  
 -----TADRPPIVETHILRSYNPVTMGDIAYLRASLPPTTRTFQS--DRPSRLRPNDESYSRAAANGELC  
 -----TADRPPIAETHILRSYNPVTMGDIALLRASLPPTVRSFQS--DPWAPLRPNDESYSRTAANGELC  
 -----TADRPPIVETHILRSYNPVTMGDIALLRALPPTGRRFES--DPQTPLRPNDDSK--AANGELC  
 -----TIERPPIVETHILPEYNPVTMGDIALLRADVWTO--PIRLRPNPTESHGTLVANGEM  
 -----TVERPPIVETHILHDYNPVTMGDIALLRADVWTE--PVRQLPPTESYRTPVANGEM  
 -----TVERPPIVEMQILRTYNPVTMGDIALLRALAEVSGRAI--RPRRRDTKALRPADGETVANGEM  
 AAALPAG--PPHYPVVEVRIILGSYNPVTMGDIALLRIPAVPGKGTAALRQRRHQLRPLPTDRIAMANGEM  
 AAVEHPAGSSQPPVARYPVVEVRIILANYNPVTMGDIALLRIPAVGTAAKTLWRRRRGQQEQQLRPLPTDRIAMANGEM

#

|   |   |   |   |   |   |   |   |   |   |   |   |   |   |   |   |   |   |   |   |   |   |   |   |   |   |   |   |   |   |   |   |   |   |   |   |   |   |   |   |   |   |   |   |   |   |   |   |   |   |   |   |   |   |   |   |   |   |   |   |   |   |   |   |   |   |   |   |   |   |   |   |   |
|---|---|---|---|---|---|---|---|---|---|---|---|---|---|---|---|---|---|---|---|---|---|---|---|---|---|---|---|---|---|---|---|---|---|---|---|---|---|---|---|---|---|---|---|---|---|---|---|---|---|---|---|---|---|---|---|---|---|---|---|---|---|---|---|---|---|---|---|---|---|---|---|---|
| Y | I | F | G | Y | G | S | Y | D | G | P | I | S | R | T | L | H | Y | G | T | V | L | A | L | D | R | E | I | G | M | G | A | V | A | P | P | T | D | S | G | M | F | E | A | I | G | R | S | D | A | K | G | D | S | G | G | G | Y | V | C | Q | R | P | P | S | - | T | Q | F | V | L | R | G |
| Y | I | F | G | Y | G | S | Y | D | G | P | I | S | R | T | L | H | Y | G | T | V | L | A | L | D | R | E | I | G | M | G | A | V | A | P | P | T | D | S | G | M | F | E | A | I | G | R | S | D | A | K | G | D | S | G | G | G | Y | V | C | Q | R | P | P | S | - | T | Q | F | V | L | R | G |
| Y | I | F | G | Y | G | S | Y | D | G | P | I | S | R | T | L | H | Y | G | T | V | L | A | L | D | R | E | I | G | M | G | A | V | A | P | P | T | D | S | G | M | F | E | A | I | G | R | S | D | A | K | G | D | S | G | G | G | Y | V | C | Q | R | P | P | S | - | T | Q | F | V | L | R | G |
| Y | I | F | G | Y | G | S | Y | D | G | P | I | S | R | T | L | H | Y | G | T | V | L | A | L | D | R | E | I | G | M | G | A | V | A | P | P | T | D | S | G | M | F | E | A | I | G | R | S | D | A | K | G | D | S | G | G | G | Y | V | C | Q | R | P | P | S | - | T | Q | F | V | L | R | G |
| Y | I | F | G | Y | G | S | Y | D | G | P | I | S | R | T | L | H | Y | G | T | V | L | A | L | D | R | E | I | G | M | G | A | V | A | P | P | T | D | S | G | M | F | E | A | I | G | R | S | D | A | K | G | D | S | G | G | G | Y | V | C | Q | R | P | P | S | - | T | Q | F | V | L | R | G |
| Y | I | F | G | Y | G | S | Y | D | G | P | I | S | R | T | L | H | Y | G | T | V | L | A | L | D | R | E | I | G | M | G | A | V | A | P | P | T | D | S | G | M | F | E | A | I | G | R | S | D | A | K | G | D | S | G | G | G | Y | V | C | Q | R | P | P | S | - | T | Q | F | V | L | R | G |
| Y | I | F | G | Y | G | S | Y | D | G | P | I | S | R | T | L | H | Y | G | T | V | L | A | L | D | R | E | I | G | M | G | A | V | A | P | P | T | D | S | G | M | F | E | A | I | G | R | S | D | A | K | G | D | S | G | G | G | Y | V | C | Q | R | P | P | S | - | T | Q | F | V | L | R | G |
| Y | I | F | G | Y | G | S | Y | D | G | P | I | S | R | T | L | H | Y | G | T | V | L | A | L | D | R | E | I | G | M | G | A | V | A | P | P | T | D | S | G | M | F | E | A | I | G | R | S | D | A | K | G | D | S | G | G | G | Y | V | C | Q | R | P | P | S | - | T | Q | F | V | L | R | G |
| Y | I | F | G | Y | G | S | Y | D | G | P | I | S | R | T | L | H | Y | G | T | V | L | A | L | D | R | E | I | G | M | G | A | V | A | P | P | T | D | S | G | M | F | E | A | I | G | R | S | D | A | K | G | D | S | G | G | G | Y | V | C | Q | R | P | P | S | - | T | Q | F | V | L | R | G |
| Y | I | F | G | Y | G | S | Y | D | G | P | I | S | R | T | L | H | Y | G | T | V | L | A | L | D | R | E | I | G | M | G | A | V | A | P | P | T | D | S | G | M | F | E | A | I | G | R | S | D | A | K | G | D | S | G | G | G | Y | V | C | Q | R | P | P | S | - | T | Q | F | V | L | R | G |
| Y | I | F | G | Y | G | S | Y | D | G | P | I | S | R | T | L | H | Y | G | T | V | L | A | L | D | R | E | I | G | M | G | A | V | A | P | P | T | D | S | G | M | F | E | A | I | G | R | S | D | A | K | G | D | S | G | G | G | Y | V | C | Q | R | P | P |   |   |   |   |   |   |   |   |   |

V I S Y G V G G A P G T P G V Y T D V A Y Y L S H F P I G P T V . . . . .  
 V I S Y G V G G A P G T P G V Y T D V A Y Y L S H F P I G P T V . . . . .  
 V I S Y G V G G A P G T P G V Y T D V A Y Y L S H F P I G P T V . . . . .  
 V I S Y G V G G A P G T P G V Y T D V A Y Y L R H F P I G P T V . . . . .  
 V I S Y G V G G A P G T P G V Y T D V A Y Y L R H F P I G P T V . . . . .  
 V I S Y G V G G A P G T P G V Y T D V A Y Y L Q Q T P I S A I I G S A . . . . .  
 V I S Y G V G G A P G T P G V Y T D V A Y Y R O H Y P F G T L I G S S . . . . .  
 I I S Y G V G G A P G T P G V Y T D V G Y Y L Q H Y P G T I I G F S . . . . .  
 I I S Y G V G G A P G T P G V Y T D V G Y Y L Q H Y P I G S I I G F S . . . . .  
 I I S Y G V G G A P G T P G V Y T D V G Y Y L Q H Y P I G A I I G L A . . . . .  
 V I S Y G V G G A T G T P G V Y T D V A Y Y L R N Y P I G S L I G T A . . . . .  
 I I S Y G V G G A I G T P G V Y T D V A Y Y L Q H S P I G S L I G P T T L K . . . . .  
 V I S Y G V G G A P G T P G V Y T D V A Y Y L Q H S P I G S F V G A S T P K . . . . .  
 I I S Y G V G G A A G T P G V Y T D V A Y Y L H H Y P M S S I K S Y . . . . .  
 I I S Y G V G G A A G T P G V Y T D V A Y Y L H H Y Q P A I T A F S D R M R S A . . . . .  
 I I S Y G V G G G A A G T P G V Y T D V A Y Y L H H Y Q P A T T S L L S D R M R F P . . . . .
